# Supplementary material for: Constraining metamorphic dome exhumation and fault activitythrough hydrothermal monazite-(Ce)
Source: Copernicus journal article supplement (doi:10.5194/se-2019-10), 2019-02-05
Supplement: Supplementary file [file se-2019-10-RC2-supplement.pdf]

### General assessment

The manuscript presents an extensive new dataset of cleft monazite ages that are an important addition to existing geochronological work in the Alps. In addition, the study presents an interesting analysis of the relationship between the duration of tectonic events and the spread in ages recorded in individual monazite crystals. The paper certainly falls within the scope of Solid Earth, but has significant shortcomings in its presentation and therefore **I recommend that it undergoes major revision before being accepted for publication in Solid Earth.**

The manuscript in its present state has three major shortcomings: 1) The data are presented and grouped in multiple ways that are not always clarified to the reader, which makes it impossible for the reader to judge whether the interpretations are sound. 2) The figure numbers appear to have been switched around several times during the preparation of the manuscript leaving many incorrect references, including a non-existing figure in the electronic supplement, making it nearly impossible to find the correct data. 3) Section 5.3 is not clearly argued and organised and needs to be revised to clarify the reasoning of the authors.

The abstract suggests the results of the study include major new findings, but in fact the results mostly confirm existing age information. To me, the value of the paper is more in the applicability of cleft monazite ages and the different expression of faster and slower tectonic processes in this dataset.

Note: This review was performed after the review of Dr. M. Rahn became available. I have tried to avoid duplication. I agree with most of his comments and suggestions.

Numbers between brackets below (1) are marked in the appended annotated manuscript.

### Specific comments

Throughout: figure numbers and references to them are a mess throughout the manuscript. This needs thorough checking.

Page 1

- The title is too general and not entirely on-topic. Metamorphic dome is rather unspecific. Please add an indication of location and perhaps time (Alpine). Given that the applicability of the method is not restricted to metamorphic domes, it may be better to rephrase the title altogether.

Page 2

- (4) It would be good to add a sentence or two at the end of the introduction that elaborates on the aims of the study.
- (6) The more generally interested reader may have no idea where we are. I suggest to move Fig. 2 here and to add a reference to this figure to section 2.1. As indicated by Dr. Rahn, Figs. 1 and 2 need to be completed with coordinates, an indication of North, etc.

Page 3

- (10) The samples were grouped “roughly correlating to tectonic subdivisions” is a vague statement and leaves the reader unable to judge the criteria that were applied. This might give an unfortunate impression of arbitrary grouping, which renders the paper less persuasive.

- (12) Regarding Figs 3 and 4, it would be good to mention briefly in the text, and not only in the figure caption what characteristic causes the zoning and how that is thought to be related to age information.

Page 4

- (13) See annotated manuscript for necessary edits to figure 1. The term “Geological-geometric in the caption is unclear. Perhaps best replaced by “Geometry”.

Pages 7 and 8

- (15) The images and all lettering in figures 3 and 4 should be enlarged so the reader is better able to assess the placement of the spots. Dr. Rahn mentions justified concerns regarding the placement of spots across boundaries between compositional domains. Some of the spots within one apparent compositional zone have different colours and it is not clear why that is the case (e.g., grains Duro2 and Klem1). The caption mentions “the color of the frame” but it is not entirely clear what that refers to. Is it the box around each weighted mean age result? Please clarify.

Pages 10-12

- (18) In addition to Dr Rahn’s comments. Please add spot numbers so the ages can be matched to the spots in figures 3 and 4. Enlarge lettering for readability; 6 pts at full size printing is usually considered minimal. I printed the pdf to A4 and most figures are too small in one way or another. The meaning of grey bands in these figures is not clear to me. Are the colours matched with those in figs 3-4?

Page 12

- (19) The content of section 5.1 is more fitting for the introduction than for the discussion.

Page 13

- (22) The decisions behind the groupings are not really explained and therefore the reason has no way to judge whether these decisions are sound, or not. In addition, as indicated in figure 3 some spots within the same apparent chemical domain (based on BSE, other compositional data that may have been used is not available to the reader) are marked with different colours and therefore apparently assigned to different groups for reasons not indicated. The groupings need to be argued more clearly to convince the reader.
- (23) “to calculate, whenever possible, weighted mean domain ages (Fig. 7).” Should this be figure 8? It is unclear to me what determines whether a weighted domain age can be calculated or, in fact, how this is done. This needs more explanation. It seems that some of this explanation is actually in the paragraph following this reference. It would be better to first explain the procedure and then present the calculated ages.
- (24) “It appears that if dissolution-precipitation may largely preserve the chemical composition of an affected crystal part, this would mean that areas with different chemical compositions may have reprecipitated simultaneously.” What is the basis for the assumption of preservation? Has this been shown in the literature? Or do the data somehow suggest this? This needs to be explained better. For the second part of the sentence, I do not understand the reasoning either. I am not an expert on monazite dating, but if the authors want the reader to trust the validity of their interpretations, they need to argue their assumptions and decisions more clearly.
- (26) There is no figure in the appendix. Has this figure been moved to the inset of Figure 8? Please correct accordingly.

Page 15

- (29) This is certainly not clear from Fig 2 or 7, and perhaps refers to Fig 8. If so, the statement that the age ranges within grains are generally longer in the Eastern and Southern domain does not appear to be supported. This could also refer to figs 5-7 (I now note that the panels are numbered continuously through figures 5-7, which is rather confusing), but there I do not see a consistency

in the graphs to support this statement either. This leaves me at a loss as to the basis of this this statement. This needs to be clarified.

Page 16

- (31) The shadings in Figure 9 render the ages illegible and this figure needs editing for clarity. It also seems that the age ranges are idealised to an extent: in 9b a 13.6  $\pm$  0.4 age is included in the 15-14 Ma range and in 9c a 13.4  $\pm$  0.3 age further West is included in the 13-11 Ma range. The 13-11 Ma area in 9c includes the area coloured in 9b, which contains almost exclusively ages  $>13$  Ma. The colouring is persuasive but the averaged ages do not appear to match the areas all that closely.

From the caption it seems that the shaded areas are based on all ages from each sample, but the weighted mean average ages are based on a selection of those. Such, presumably unintentional juggling with the data makes it almost impossible for the reader to judge the value of the results and interpretations, which is very unfortunate. The authors need to do a better job in presenting their results to convince me that their interpretations are valid and can be used to underpin a tectonic scenario.

Page 18

- (36) The first sentence of the conclusions is a bit awkward. Please rephrase.
- (37) “age clusters within individual crystals from a simply exhuming area have a less clear age distribution than samples from fault zone areas, or fast exhuming areas.” This apparently main conclusion is new here and was not that clearly presented in the discussion. It would be good to add a couple of sentences specifying the argument and its conclusions. The same goes for the next sentence.
- (38) The conclusions presented here paint a much clearer picture than section 5.3. The regional references (to the various faults and domes) are less clear in 5.3. Section 5.3 needs a thorough rewrite, and perhaps splitting in two sections to present the arguments more clearly. The first part could argue the conclusions about slow vs. punctuated events leading to broader and narrower age ranges, respectively, whilst the second part would present the tectonometamorphic development of the study area (leading to the conclusions in the second paragraph of section 6).

### Technical corrections

Many suggested corrections for spelling and grammar and indicated in the annotated manuscript. In addition, please consider the following numbered comments.

Page 1

- (1) Earlier in the Abstract the authors argue that using cleft Mz is superior to other dating techniques because it is not cooling based. It then seems somewhat inconsistent to highlight cooling in line 8. Better to say exhumation only.
- (2) The final sentence is very general and it would be better to be more specific as to what kind of information can be derived by dating of cleft-Mz.

Page 2

- (3) Alpine is used a lot here (once also without capital), but the processes considered in the study are not likely to be restricted to Alpine orogenesis or the Alps orogeny. It would be better to phrase this a bit more generally.
- (5) This sentence is very vague. Either be more specific, or leave out.

Page 3

- (7) I am not sure what is meant by ‘staggered’ exhumation.
- (8) This reference to Central Lepontine is unclear, because the next sentences refer to more specific areas that are indicated in Fig. 2.

(9) Number figures in order of mention in the text. The current figures 1 and 2 should be swapped.  
This is consistent with comment (6) above.

Page 5

(11) Please add the groupings to Table 1.

Page 6

(14) Please check figure references. This should probably Figs 5 through 7.

Pages 7 and 8

(16) On both pages colour and color is used in the same sentence. Please use either British or American English spelling consistently.

Page 9

(17) The caption of Table 2 does not describe its content. Please correct. The text that is now in the caption is in fact a note.

Page 12

(20) Suggestion to rephrase: "...existing grain. Alternatively, dissolution-reprecipitation may cause precipitation of a secondary monazite-(Ce) phase from the fluid film at the surface of the primary phase."

Page 13

(21) The reference to Grand'Homme et al., 2018 is not in the bibliography.

(25) It would be good to add a reference supporting these statements.

(27) "another reason" is confusing here, because in lines 17-18 prolonged tectonic activity is already mentioned as a possible reason for age spread. In addition, the description "...prolonged phases of low-intensity tectonic activity of multiple small deformation events..." is very vague. Please revise to address both these issues.

Page 15

(28) Correct references. Presumably Fig. 8 and Table 2.

(30) Clarify the location of the Rhine-Rhone line in the text and give it the same font size in figure 9 as all other faults

Page 17

(32) panels a and b are in figure 5, j and k are in 6. All figure references need to be thoroughly checked and corrected.

(33) "clear age patterns within the crystals" is a very vague criterion, which can not be judged by the reader. Please be as specific as possible.

(34) Again, "staggered" is used in a sense that is not entirely clear to me. It would help if the authors clarify to which part of Fig 8 this refers.

(35) The mention of hydrothermal gold mineralisation is very random and appears to have little relationship with the rest of the study. Consider leaving this out.

Pages 19 and further - Bibliography

Missing from the reference list:

Milnes (1974)

Not referenced in the paper:

Frisch (1979)

Frisch et al (2000)

Glottzbach

Keller et al (2006)

Kralik et al

Putnis 2002 and 2009

Schmid et al (1996)

Possible mistakes:

Grand'Homme et al. 2016 or 2018?

Steiger and Jaeger: Title is "Subcommittee on Geochronology: Convention ...."

Wiederkehr et al. 2008 or 2009?

# Constraining metamorphic dome exhumation and fault activity through hydrothermal monazite-(Ce)

Add location information to title

Christian A. Bergemann<sup>1,2</sup>, Edwin Gnos<sup>2</sup>, Alfons Berger<sup>3</sup>, Emilie Janots<sup>4</sup>, and Martin J. Whitehouse<sup>5</sup>

<sup>1</sup>University of Geneva, Geneva, Switzerland

<sup>2</sup>Natural History Museum of Geneva, Switzerland

<sup>3</sup>University of Bern, Switzerland

<sup>4</sup>ISTerre University of Grenoble, France

<sup>5</sup>Swedish Museum of Natural History, Stockholm, Sweden

**Correspondence:** Christian Bergemann (christian.bergemann@unige.ch)

**Abstract.** Zoned monazite-(Ce) from Alpine fissures/clefts is used to gain new insights into the exhumation history of the Central Alpine Lepontine metamorphic dome, and timing of deformation along the Rhone-Simplon fault zone on the dome's western termination. These hydrothermal monazites-(Ce) directly date deformation and changes in physiochemical conditions through crystallization ages, in contrast to commonly employed cooling-based methods. The 480 SIMS measurement ages from 20 individual crystals record ages over a time interval between 19 and 5 Ma, with individual grains recording ages over a lifetime of 2 to 7.5 Myr. The age range combined with age distribution and internal crystal structure help to distinguish between areas whose deformational history was dominated by distinct tectonic events or continuous exhumation. The combination of this age data with geometrical considerations and spatial distribution give a more precise exhumation/cooling history for the area. In the east and south of the study region, the units underwent monazite-(Ce) growth at 19-12.5 and 16.5-10.5 Ma, followed by a central group of monazite-(Ce) ages at 15-10 Ma and the movements and related cleft monazites-(Ce) are youngest at the western border with 13-7 Ma. A last phase around 8-7 Ma is limited to clefts of the Simplon normal fault and related strike slip faults as the Rhone and Rhine-Rhone faults. The large data-set spread over significant metamorphic structures shows that the opening of clefts, fluid flow and monazite-(Ce) stability is directly linked to the geodynamic evolution in space and time.

## 1 Introduction

- Metamorphic domes like the Lepontine area of the Central Alps often experienced a complex tectono-metamorphic evolution. In this case, an interplay between exhumation and deformation during doming and activity of large fault systems that dominate the western parts of the area. Although much of the (thermo)chronological history of the area is well known, hydrothermal monazite-(Ce) ages complement existing cooling ages of zircon fission track, Rb-Sr in biotite and apatite fission track/apatite U-Th/He by providing crystallization and dissolution-precipitation ages that date low-T tectonic evolution.
- Monazite, (LREE,Th,U)PO<sub>4</sub>, is considered an excellent mineral for dating of geologic processes (e.g., Parrish, 1990) that is highly resistant to radiation damage (e.g., Meldrum et al., 1998, 1999, 2000) and shows negligible Pb loss through diffusion (Cherniak et al., 2004; Cherniak and Pyle, 2008). Nonetheless, monazite remains geologically reactive after crystallization. It

Annotations FM Brouwer

① numbers refer to comments in review supplement



can experience dissolution-recrystallization, thereby recording new ages through mediation of hydrous fluids (e.g., Seydoux-Guillaume et al., 2012; Janots et al., 2012; Grand'Homme et al., 2016).

In the study area, Alpine fissures and clefts occasionally containing monazite-(Ce) are voids partially filled by crystals that crystallized on the cleft walls from hydrous fluids during late stage Alpine metamorphism (Mullis et al., 1994; Mullis, 1996). Dating such mineralization is often difficult due to later overprinting along with multiple stages of fluid activity (Purdy and Stalder, 1973). Alpine fissures in some metasediments and metagranitoids have long been known to contain well-developed monazite-(Ce) crystals (Niggli et al., 1940), but it is only recently that some of these could be dated (Gasquet et al., 2010; Janots et al., 2012). Although other minerals like micas and adularia are common in Alpine fissures, they are often affected by overpressure/excess argon, (e.g., Purdy and Stalder, 1973), and it is not always clear if these ages represent crystallization or cooling (e.g., Rauchenstein-Martinek, 2014). The Alpine fissures and clefts in the Lepontine region formed after the metamorphic peak, in relation to extensional tectonic activity. In accordance with this tectonic activity, fissures and clefts are oriented roughly perpendicular to lineation and foliation of the host rock. The fluid that intruded during fissure formation (300-500°C; Mullis et al., 1994; Mullis, 1996) interacts with the wall rock. This triggered dissolution and precipitation of minerals in both host rock and fissure, causing the formation of a porous alteration halo in the surrounding wall rock. Complex growth domains are common in hydrothermal monazite-(Ce) from such fissures showing both dissolution and secondary growth (e.g., Janots et al., 2012), as well as dissolution-reprecipitation reactions resulting in patchy grains (e.g., Gnos et al., 2015). In contrast to metamorphic rocks, where monazite-(Ce) rarely exceeds 100  $\mu\text{m}$ , cleft monazite-(Ce) is commonly mm-sized, with large individual growth domains. This permits dating individual domains precisely by using SIMS (secondary ion mass spectrometry) and even resolution of growth duration (Janots et al., 2012; Berger et al., 2013; Bergemann et al., 2017, 2018, 2019).

## 2 Geological setting

### 2.1 Evolution of the study area

The formation of the nappe stack of the Alps caused by the collision of the European and Adriatic plates was followed by the development of several metamorphic domes (Tauern and Rechnitz in Austria, and Lepontine in the western Alps; e.g. Schmid et al., 2004). Their formation was related to crustal shortening associated with coeval orogen-parallel extension (e.g., Mancktelow, 1992; Ratschbacher et al., 1991; Ratschbacher et al., 1989; Steck and Hunziker, 1994). The Western and Central Alps with the Lepontine metamorphic dome have consequently had a complex tectonic and metamorphic history.

Early high-pressure metamorphism in the Western Alpine Sesia-Lanzo Zone during subduction below the Southern Alps is dated at 75-65 Ma (e.g. Ruffet et al., 1997; Duchêne et al., 1997; Rubatto et al., 1998). This was followed by underthrusting and nappe stacking from ca. 42 Ma on during continental collision linked with a transition from high-P to high-T metamorphism (e.g. Köppel and Grünenfelder, 1975; Markley et al., 1998; Herwartz et al., 2011; Boston et al., 2017). Peak metamorphic conditions in the Lepontine area, in excess of 650°C in some regions, were reached diachronously from south to north in time around 30-19 Ma and accompanied by limited magmatic activity from 33 Ma down to ca. 22 Ma (von Blanckenburg et al., 1991; Romer et al., 1996; Schärer et al., 1996; Oberli et al., 2004; Rubatto et al. 2009; Janots et al., 2009). Prograde metamorphism



7 was followed by staggered exhumation in the Ticino and Toce culminations of the Lepontine dome. Accelerated cooling below  
8 = 500°C occurred at 26 Ma first in the central Lepontine (Hurford, 1986). This was followed in the east by a period of rapid  
cooling of the Ticino dome between 22 and 17 Ma (Steck and Hunziker, 1994; Rubatto et al., 2009) after which exhumation  
slowed down. To the west, the Toce dome experienced phases of accelerated cooling somewhat later in the time of 18-15 Ma  
5 and 12-10 Ma (Campani et al., 2014). The later cooling phase was related to detachment along the Rhone-Simplon Fault (Steck  
and Hunziker, 1994; Campani et al., 2014).

While most of the Lepontine area is marked by doming and associated deformation events, the western and southwestern  
limits of the study area are dominated by the Rhone-Simplon Fault system, its extensions to the Rhine-Rhone Line to the north  
along the Aar massif and the Centovalli Fault to the south. The extensional Simplon Fault zone (SFZ) was already active during  
10 thrusting in the external Alpine domain (e.g., Grosjean et al., 2004), with transpressional movements in the hanging wall of the  
dextral ductile Simplon shear zone occurring from ca. 32 Ma on (Steck, 2008). The ductile-brittle transition of the SFZ was  
constrained to the time between 14.5 and 10 Ma (Campani et al., 2010). Brittle deformation of the SFZ and Centovalli fault  
continued after this (Zwingmann and Mancktelow, 2004; Surace et al., 2011), with the youngest displacement activity dated to  
ca. 5-3 Ma (Campani et al., 2010).

## 15 2.2 The study Area

9 The study area comprises roughly half of the Lepontine metamorphic dome (Fig. 2), from the Tambo nappe, east of the Forcola  
fault, over the central Lepontine dome to the Val d'Ossola, south of the Centovalli Fault, and the southern Gotthard nappe and  
Aar massif to the north. See Fig. 1 for the tectonic position of the samples. The total number of 20 monazite-(Ce) samples  
dated in this study and 6 samples described in the literature (Janots et al., 2012; Berger et al., 2013; Bergemann et al., 2017)  
10 were divided into four groups roughly correlating to tectonic subdivisions of the area (Fig. 2). These are (1) the area to the east  
of the Forcola Fault (East; 2 samples), (2) the central Ticino dome and southern Gotthard nappe (Center; 7 samples), (3) the  
Toce dome, bounded by the Rhone-Simplon Fault to the west and adjacent south-western Gotthard nappe and parts of the Aar  
massif (West; 10 samples), and (4) the area to the south of the Centovalli and southern Simplon faults (South; 1 sample). Most  
of the samples were provided by mineral collectors, as hydrothermal cleft monazite-(Ce) is uncommon and often difficult to  
11 detect in the field when covered by dirt or chlorite. See Table 1 for location details.

## 3 Analytical techniques

Monazites-(Ce) were individually polished to the level of a central cross section and assembled in mounts of several grains.  
Backscatter electron (BSE) images were then obtained. Secondary ion mass spectrometry (SIMS) spot analyses (Fig. 3) were  
12 placed according to compositional domains visible in these images in order to capture the crystallization history. As far as  
possible, the placement of measurement spots located near cracks or holes was avoided, as the Th-Pb isotope system may be  
30 disturbed in these areas (Janots et al., 2012; Berger et al., 2013).



North? coordinates? scale?

which sample is this?

indication in (now) Fig 2.

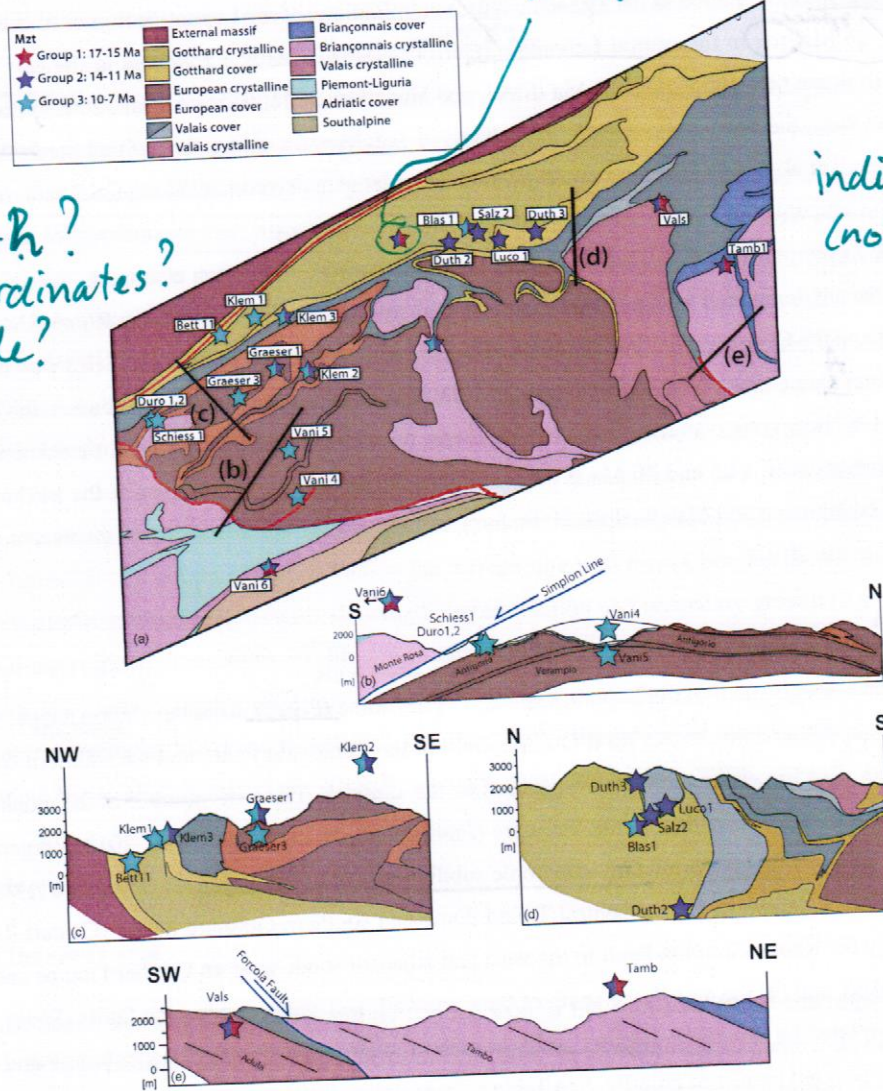

**Figure 1.** Geological-geometric situation of the study area. (a) Tectonic sketch map modified after Steck et al. (2013) and Schmid et al. (2004); (b) Tectonic section over the Simplon Fault zone into the western Lepontine, based on Campani et al. (2014); (c) Tectonic section through the western Northern Steep Belt, modified and extended after Leu (1986); (d) Tectonic section through the eastern Northern Steep Belt, redrawn after Wiederkehr et al. (2008); (e) Sketch of the situation at the Forcola normal fault, see also Meyre et al., (1998) and Berger et al. (2005).

Th-Pb analyses were conducted at the Swedish Museum of Natural History (NordSIM facility) on a Cameca IMS1280 SIMS instrument. Analytical methods and correction procedures followed those described by Harrison et al. (1995), Kirkland et al. (2009), and Janots et al. (2012), using a -13 kV  $O_2^-$  primary beam of ca. 6 nA and nominal 15  $\mu m$  diameter. The mass

space

space  
italic

CAMECA ims1280

**Table 1.** Information on sample localities for all analyzed grains. Sample GRAESER1 has identification number NMBa 10226, VALS has NMBE43124.

| Sample   | Locality                                     | Latitude   | Longitude | Altitude (m) |
|----------|----------------------------------------------|------------|-----------|--------------|
| BETT11   | Bettelbach,<br>Niederwald, Goms              | 46°25.62'  | 8°11.70'  | 1460         |
| BLAS1    | Piz Blas,<br>Val Nalps, Sedrun               | 46°34.68'  | 8°43.98'  | 2790         |
| DURO1    | Doru, Gantertal,<br>Simplon                  | 46°17.63'  | 8°02.07'  | 1160         |
| DURO2    | Doru, Gantertal,<br>Simplon                  | 46°17.64'  | 8°02.07'  | 1160         |
| DUTH2    | Lago Suco,<br>Val Cadlimo                    | 46°33.80'  | 8°41.50'  | 2620         |
| DUTH3    | Lago Retica, Lagi<br>di Campo Blenio         | 46°34.45'  | 8°53.57'  | 2400         |
| DUTH6    | Pizzo Rüscada, Valle<br>di Prato (Lavizzara) | 46°24.57'  | 8°40.09'  | 2420         |
| GRAESER1 | Lärcheltini, Binntal                         | ~46°22.25' | ~8°14.89' | ~1860        |
| GRAESER3 | Wannigletscher,<br>Cherbadung, Binntal       | ~46°19.46' | ~8°12.98' | ~2720        |
| KLEM1    | Grosses Arsch,<br>Blinnental                 | 46°26.71'  | 8°16.33'  | ~1900        |
| KLEM2    | Alpe Devero,<br>Val Antigorio                | 46°22.16'  | 8°18.44'  | 2340         |
| KLEM3    | Griessgletscher                              | 46°26.59'  | 8°19.46'  | 2840         |
| LUCO1    | Lucomagno                                    | 46°33.79'  | 8°48.10'  | 1915         |
| SALZ2    | Piz Scai                                     | ~46°34.5'  | ~8°45.75' | ~2740        |
| SCHIESS1 | Schiessbach/Simplon                          | 46°18.13'  | 8°04.18'  | 1760         |
| TAMB1    | Pizzo Tambo, Splügen                         | 46°30.48'  | 9°18.35'  | 2460         |
| VALS     | Vals, Valsertal                              | ~46°37.33' | ~9°17.28' | ~3150        |
| VANI4    | Montecrtese                                  | 46°09.60'  | 8°19.18'  | 370          |
| VANI5    | Crino Baceno                                 | 46°15.13'  | 8°19.14'  | 710          |
| VANI6    | Cava Maddalena, Beura                        | 46°04.30'  | 8°17.71'  | 260          |

Add grouping  
(E, center, W, S).  
cf. page 3.

*Italy*

— spectrometer was operated at +10kV and a mass resolution of ca 4300 ( $M/\Delta M$ , at 10% peak height), with data collected in peak hopping mode using an ion-counting electron multiplier. Unknowns were calibrated against monazite-(Ce) standard



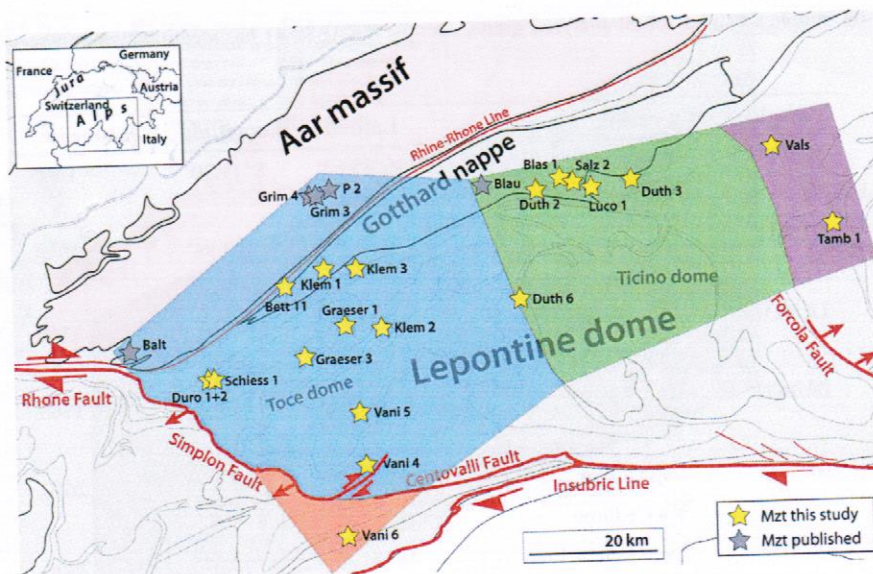

**Figure 2.** Map of the Lepontine metamorphic dome, modified from Steck *et al.* (2013) and Schmid *et al.* (2004). Colored areas mark areal division in the context of this study. Published monazite-(Ce) locations (grey stars) are from Janots *et al.* (2012), Berger *et al.* (2013) and Bergemann *et al.* (2017).

44069 (Aleinikoff *et al.*, 2006). Lead isotope signals were corrected for common Pb contribution using measured  $^{204}\text{Pb}$  and an assumed present-day Pb isotope composition according to the model of Stacey and Kramers (1975). The measurement of  $^{204}\text{Pb}$  is subject to an unresolvable molecular interference by  $^{232}\text{Th}^{143}\text{Nd}^{16}\text{O}_2^{++}$ , also affecting  $^{206}\text{Pb}$  and  $^{207}\text{Pb}$  to a lesser degree through replacement of  $^{16}\text{O}$  with heavier O-isotopes, which may result in an overestimation of common Pb concentrations. A correction was applied whenever the  $^{232}\text{Th}^{143}\text{Nd}^{16}\text{O}_2^{++}$  signal at mass 203.5 exceeded the average background signal on the ion-counting detector by three times its standard deviation. Age calculations use the decay constants recommended by Steiger and Jäger (1977). Th-Pb ages presented were corrected for common Pb and doubly charged  $^{232}\text{Th}^{143}\text{Nd}^{16}\text{O}_2^{++}$  overlap and are given at  $2\sigma$  uncertainties.

#### 4 Results

- 10 The complete ion-probe data set is given in the data Supplement Table 1 (PANGAEA, doi: still pending), see Tab. 2 for an overview and Figs. 4 and 7 for measurement positions and a graphical representation. As there are difficulties with the U-Pb system for hydrothermal monazite-(Ce) (Janots *et al.*, 2012), only  $^{208}\text{Pb}/^{232}\text{Th}$  ages were used. For explanations on age patterns across the grains, grouping and weighted mean age determination, see the discussion in Chapter 5.2.

within?

Section



~~14~~ 15

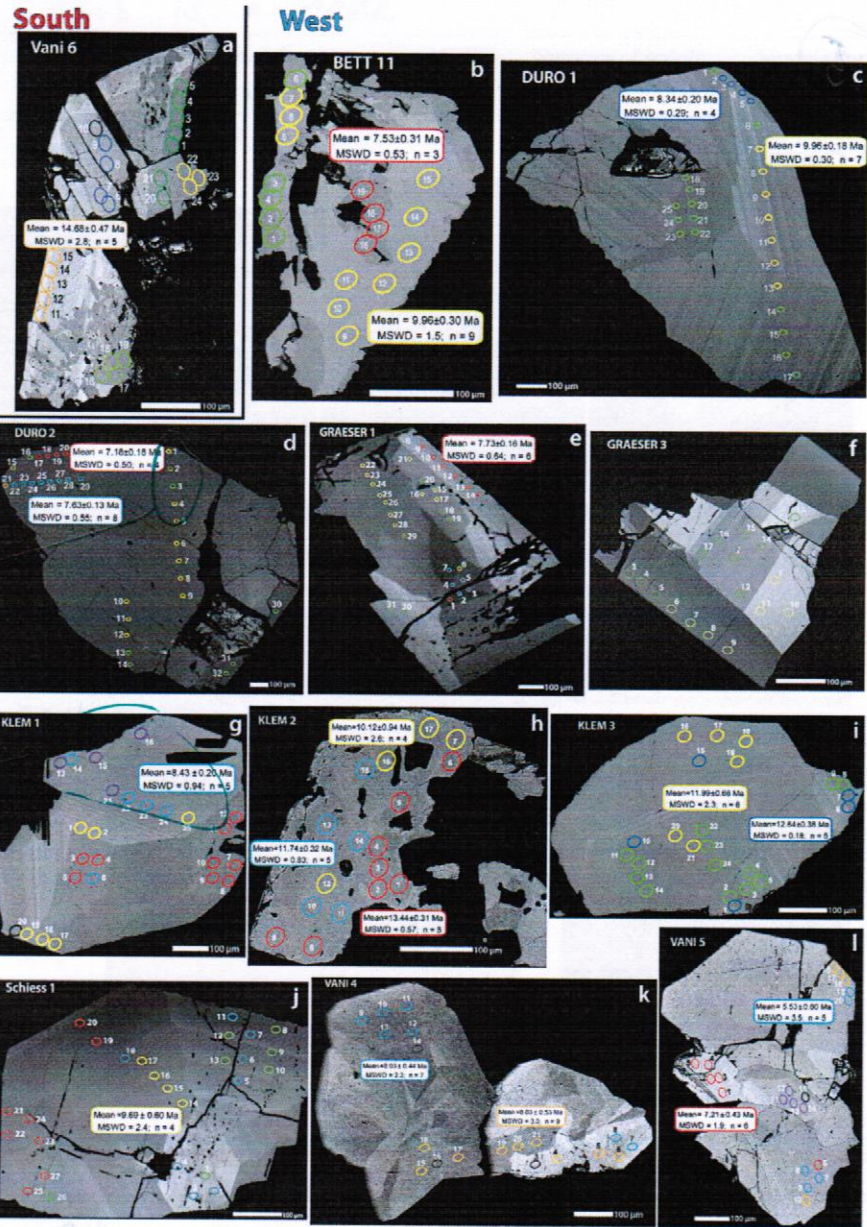

yellow-green-yellow  
Why?

not clear  
Why purple  
and blue  
should be  
in different  
domains

Figure 3. Back-scatter electron images of studied cleft monazite-(Ce). The zonation corresponds largely to variations in Th contents. Spots refer to SIMS analysis spots, with colours indicating chemical and age domains. The color of the frame indicates data for which it was possible to calculate weighted mean  $^{208}\text{Pb}/^{232}\text{Th}$  ages.



15

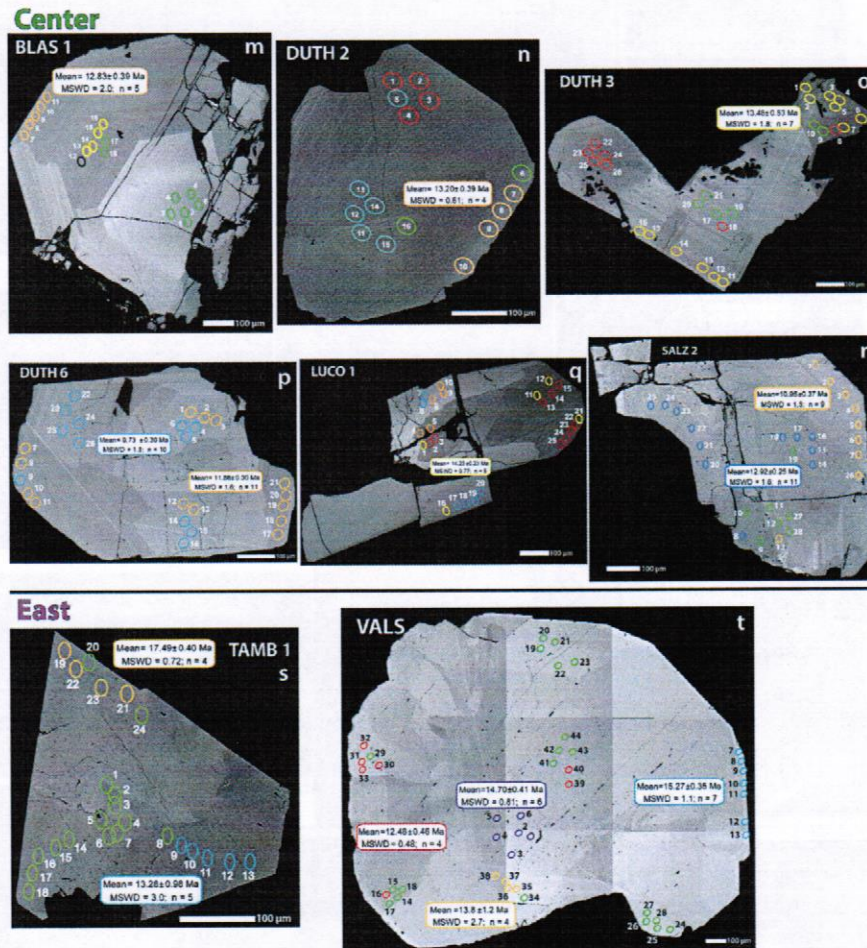

**Figure 4.** Back-scatter electron images of studied cleft monazite-(Ce). The zonation corresponds largely to variations in Th contents. Spots refer to SIMS analysis spots, with colours indicating chemical and age domains. The color of the frame indicates data for which it was possible to calculate weighted mean  $^{208}\text{Pb}/^{232}\text{Th}$  ages.

(17)

Caption &amp; what is in the table.

Table 2. Measurement spots AIGG1 1, 9, 11, BLANC2 7, 8, 23 and SALZ15 4 were excluded due to their location on cracks or signs of mineral inclusions. *this is a note*

| Sample   | Figure | Weighted mean domain ages<br>(Ma) | MSWD | Number of points | Sample spot age range<br>(Ma)     |
|----------|--------|-----------------------------------|------|------------------|-----------------------------------|
| VANI6    | 3a, 4a | $14.68 \pm 0.47$                  | 2.8  | 5                | $16.80 \pm 0.31 - 10.62 \pm 0.18$ |
| BETT11   | 3b, 4c | $9.96 \pm 0.30$                   | 1.5  | 9                | $10.55 \pm 0.33 - 7.34 \pm 0.26$  |
|          |        | $7.53 \pm 0.31$                   | 0.53 | 3                |                                   |
| DURO1    | 3c, 4c | $9.96 \pm 0.18$                   | 0.30 | 7                | $10.82 \pm 0.26 - 8.21 \pm 0.20$  |
|          |        | $8.34 \pm 0.20$                   | 0.29 | 4                |                                   |
| DURO2    | 3d, 4d | $7.63 \pm 0.13$                   | 0.55 | 8                | $11.48 \pm 0.28 - 7.02 \pm 0.18$  |
|          |        | $7.18 \pm 0.18$                   | 0.50 | 4                |                                   |
| GRAESER1 | 3e, 4e | $9.03 \pm 0.19$                   | 0.28 | 5                | $12.14 \pm 0.30 - 7.57 \pm 0.19$  |
|          |        | $7.91 \pm 0.26$                   | 1.7  | 7                |                                   |
| GRAESER3 | 3f, 4f |                                   |      |                  | $15.60 \pm 0.61 - 6.36 \pm 0.39$  |
| KLEM1    | 3g, 4g | $8.43 \pm 0.20$                   | 0.94 | 5                | $10.64 \pm 0.26 - 7.97 \pm 0.20$  |
| KLEM2    | 3h, 4h | $13.44 \pm 0.31$                  | 0.57 | 5                | $13.65 \pm 0.33 - 9.47 \pm 0.40$  |
|          |        | $11.74 \pm 0.32$                  | 0.83 | 5                |                                   |
|          |        | $10.12 \pm 0.94$                  | 2.6  | 4                |                                   |
| KLEM3    | 3i, 4i | $12.64 \pm 0.38$                  | 0.18 | 5                | $12.96 \pm 0.46 - 8.43 \pm 0.32$  |
|          |        | $11.99 \pm 0.66$                  | 2.3  | 6                |                                   |
| SCHIESS1 | 3j, 4j | $9.69 \pm 0.60$                   | 2.4  | 4                | $9.94 \pm 0.25 - 6.78 \pm 0.18$   |
| VANI4    | 3k, 4k | $8.03 \pm 0.53$                   | 3.3  | 9                | $9.27 \pm 0.43 - 6.89 \pm 0.37$   |
|          |        | $8.03 \pm 0.44$                   | 2.2  | 7                |                                   |
| VANI5    | 3l, 4l | $7.21 \pm 0.43$                   | 1.9  | 6                | $8.07 \pm 0.36 - 4.86 \pm 0.24$   |
|          |        | $5.53 \pm 0.60$                   | 3.5  | 5                |                                   |
| BLAS1    | 3m, 4m | $12.83 \pm 0.39$                  | 2.0  | 5                | $14.49 \pm 0.26 - 7.82 \pm 0.22$  |
| DUTH2    | 3n, 4n | $13.20 \pm 0.39$                  | 0.61 | 4                | $14.34 \pm 0.41 - 11.15 \pm 0.43$ |
| DUTH3    | 3o, 4o | $13.48 \pm 0.53$                  | 1.8  | 7                | $14.53 \pm 0.43 - 10.61 \pm 0.34$ |
| DUTH6    | 3p, 4p | $11.88 \pm 0.30$                  | 1.6  | 11               | $12.60 \pm 0.37 - 9.33 \pm 0.32$  |
|          |        | $9.73 \pm 0.30$                   | 1.8  | 10               |                                   |
| LUCO1    | 3q, 4q | $14.23 \pm 0.23$                  | 0.77 | 5                | $14.74 \pm 0.30 - 9.90 \pm 0.17$  |
| SALZ2    | 3r, 4r | $12.92 \pm 0.25$                  | 1.6  | 11               | $14.28 \pm 0.74 - 10.51 \pm 0.39$ |
|          |        | $10.95 \pm 0.37$                  | 1.5  | 9                |                                   |
| TAMB1    | 3s, 4s | $17.49 \pm 0.40$                  | 0.72 | 4                | $19.02 \pm 0.47 - 8.32 \pm 0.11$  |
|          |        | $13.28 \pm 0.98$                  | 3.0  | 5                |                                   |
| VALS     | 3t, 4t | $15.27 \pm 0.35$                  | 1.1  | 7                | $16.43 \pm 0.61 - 12.09 \pm 0.57$ |
|          |        | $14.70 \pm 0.41$                  | 0.81 | 6                |                                   |
|          |        | $12.48 \pm 0.46$                  | 0.48 | 4                |                                   |

References  
are incorrect.



18

add numbers to match  
with spots in figs 3 and 4  
what does grey mean?

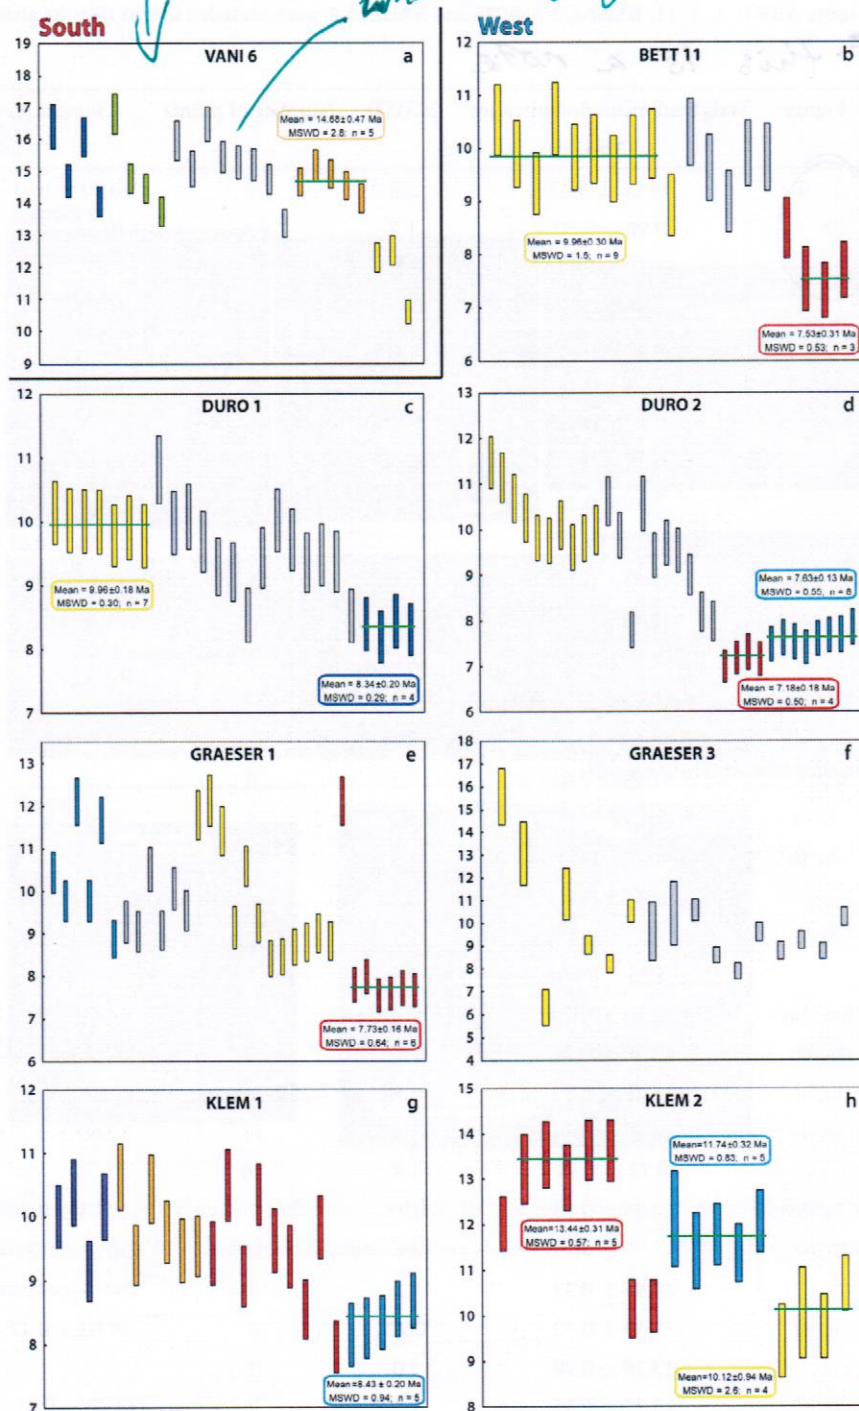

Figure 5. Diagrams showing  $^{208}\text{Pb}/^{232}\text{Th}$  ages for all samples. The colours indicate chemical domains with weighted mean  $^{208}\text{Pb}/^{232}\text{Th}$  ages given where applicable.

in the S and W areas

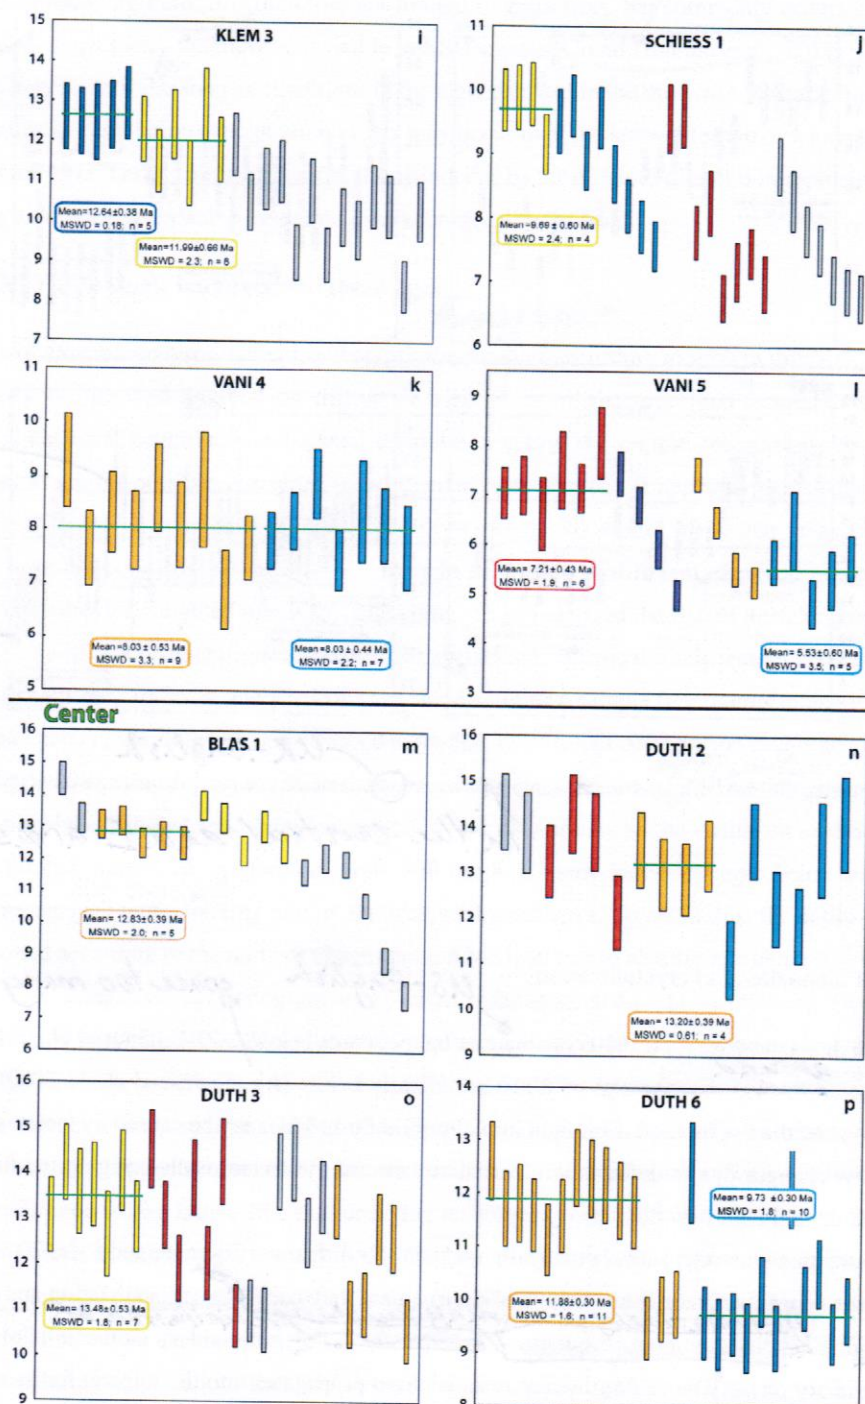

Figure 6. Diagram showing  $^{208}\text{Pb}/^{232}\text{Th}$  ages for the samples. The colours indicate chemical domains with weighted mean  $^{208}\text{Pb}/^{232}\text{Th}$  ages given where applicable.

*in the W and central areas*



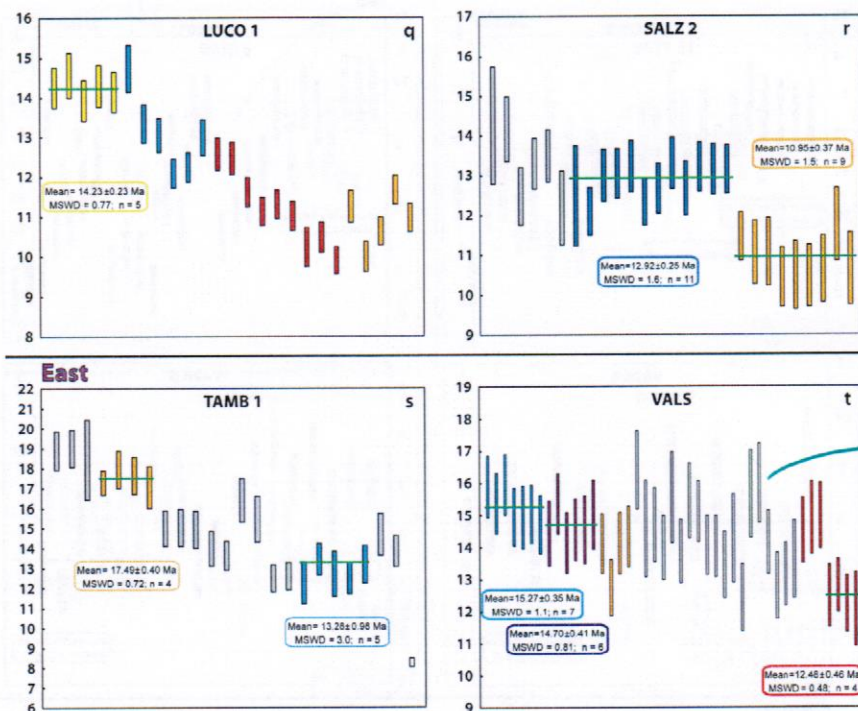

Figure 7. Diagrams showing  $^{208}\text{Pb}/^{232}\text{Th}$  ages for all samples. The colours indicate chemical domains with weighted mean  $^{208}\text{Pb}/^{232}\text{Th}$  ages given where applicable.

## 5 Discussion

### 5.1 Hydrothermal monazite-(Ce) crystallization

Hydrothermal fissure monazite-(Ce) typically crystallizes at temperatures below  $350^\circ\text{C}$  (Gnos et al., 2015; Bergemann et al., 2017, 2018) down to somewhere in the range of  $200^\circ\text{C}$  or slightly below (e.g. Townsend et al., 2000). Crystallization and later reactions occur when the fissure fluid is brought into disequilibrium. This may be caused by tectonic events for a number of reasons: by volume changes due to deformation, partial collapse of the fissure walls bringing the fluid into contact with unaltered wallrock or the influx of new fluid.

After crystallization, monazite-(Ce) shows practically no U-Th-Pb diffusion (Cherniak and Pyle, 2008). However, replacement mechanisms that may be active in a hydrothermal environment may cause re-crystallization and possibly new growth around an existing grain. Alternatively, may cause precipitation of a secondary monazite-(Ce) phase precipitates at the surface of the primary phase. The self-sustaining reaction front propagates into the mineral for as long as the interfacial fluid retains a connection to a fluid reservoir. This dissolution-reprecipitation process may be initiated on any part of the crystal



not in bibliography!

in contact with the surrounding fluid. It is therefore not limited to grain rims, but commonly occurs along mineral inclusion interfaces, cracks and microcracks. <sup>which for</sup> ~~that~~ may be invisible in BSE images (Grand/Homme et al., 2018).

These processes may be active as long as conditions in the cleft stay within the monazite-(Ce) stability field. Therefore, several (re-)crystallization or dissolution-precipitation cycles may occur over the active lifespan of a monazite-(Ce) crystal. Later reactions may be aided by secondary porosity and fracturing induced by the previous dissolution-reprecipitation/recrystallization events, by bringing an increased crystal volume into direct contact with the fluid.

## 5.2 Monazite-(Ce) Th-Pb single and weighted mean ages

As detailed above, SIMS spot analyses were placed <sup>throughout</sup> across the samples according to growth domains visible in BSE images

(Fig. 4). The derived spot ages were <sup>3+</sup> grouped together on the basis of chemical composition thought to represent crystallization under homogeneous chemical conditions, and spatial distribution across the sample according to zonation visible on BSE

images to calculate. <sup>25</sup> whenever possible, weighted mean domain ages (Fig. 8). <sup>26</sup> It appears that dissolution-precipitation may largely preserve the chemical composition of an affected crystal part, this would mean that areas with different chemical compositions may have reprecipitated simultaneously. Despite this, spots of different chemical groups were only in a few,

clear cases grouped together for weighted mean age calculation. This is to avoid the risk of mistaking multiple mixing ages of different chemical domains as a distinct event. In areas that experienced few and discrete tectonic events, this approach allows the calculation of domain ages for most analyzed spots of the dataset of a sample (e.g. Janots et al., 2012; Bergemann et al.,

2017). However, large parts of the study area experienced more than two distinct deformation events and/or phases of prolonged activity. New growth on an existing crystal results in sharp boundaries between zones. <sup>tectonic</sup> But dissolution-reprecipitation processes may lead to irregularly shaped altered zones within a crystal, which may or may not be visible on a BSE image. If this happens

multiple times the limited number of analyses per grain will result in many individual ages being discarded, <sup>us-English</sup> meaning that events may not be recognized when looking only at the weighted mean ages. To avoid this, the entire dataset of each region

was additionally plotted according to the number of ages per 0.5 Ma intervals to identify age clusters (Fig. 1, appendix). In the next step the peaks or plateaus of the age histogram were plotted according to their relative intensity. They were then combined with the weighted average ages (this study; Janots et al., 2012; Berger et al., 2013; Bergemann et al., 2017) to visualize distinct

events or phases of tectonic activity (Fig. 8). As only a limited number of analyses <sup>can be obtained</sup> are possible to obtain for each grain, some weighted mean ages combine only a small number of individual ages. This is especially true for ages dating multiple late stage events that presumably happened at relatively low temperatures. In such cases only those weighted mean ages were kept

whose geologic significance is also indicated by other dating techniques such as fault gouge dating, specifically close to the Rhone-Simplon line. Otherwise, these ages are included in the overall age range of the sample in question given in Tab. 2.

Another reason for a spread out age pattern may be a grain experiencing prolonged phases of low-intensity tectonic activity of

multiple small deformation events during exhumation. In <sup>that</sup> which case only small volumes of monazite-(Ce) would reprecipitate

due to disequilibrium during deformation. This leads <sup>tendentially</sup> to unclear crystal zonations that make it difficult to correctly

??  
Inset in Fig 8?



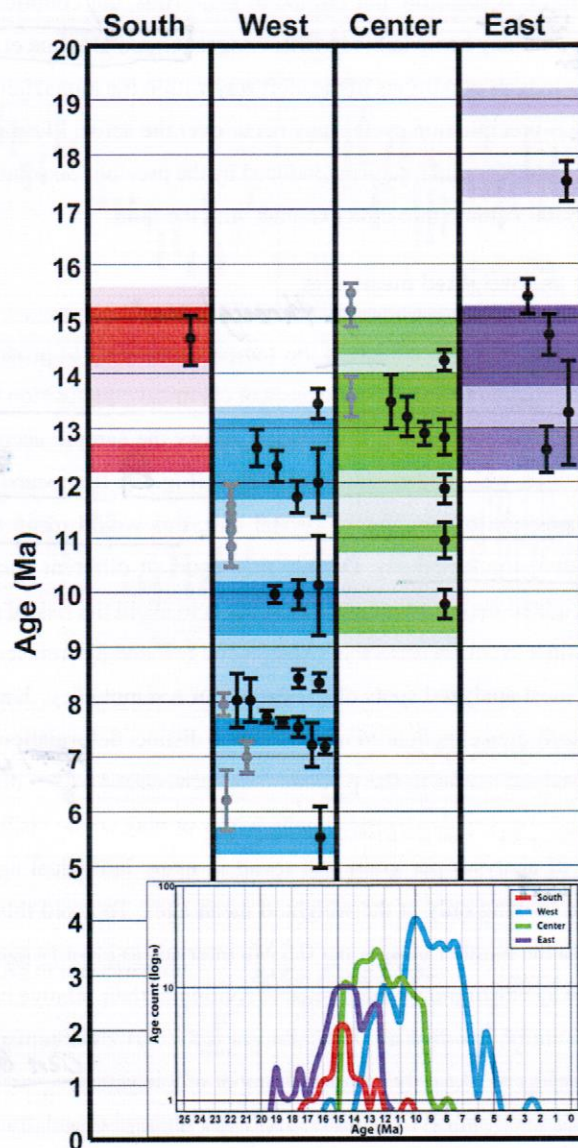

**Figure 8.** Time diagram combining identified peaks and weighted mean ages derived from the data displayed in Fig. 1, appendix, and weighted mean average ages. The color intensity indicates the amount of spot ages in this range. Lighter shades indicate fewer ages. Black error bars indicate weighted mean ages from this study, while grey bars indicate data from Janots et al. (2012), Berger et al. (2013) and Bergemann et al. (2017). The inset shows an age histogram representing the complete dataset of each region according to the number of ages per 0.5 Ma intervals.

26 ?? inset?

Is it possible to quantify?



- identify growth zones on BSE images (compare Gnos et al., 2015; Bergemann et al., 2018). *In contrast?* As opposed to areas where crystals
- record individual, stronger deformation events ~~that~~ tend to show a sharper zonation (compare Janots et al., 2012; Berger et al., 2013; Bergemann et al., 2017, 2019).

### 5.3 Monazite-(Ce) ages and Lepontine history

8?

- Hydrothermal cleft monazite-(Ce) crystallization and dissolution-reprecipitation *varied in space and time in* occurred over time in different parts of the study region, as it passed through the monazite-(Ce) stability field. The time interval recorded within individual monazite-(Ce) crystals spans from 2.5 Ma to 7 Ma for individual grains (Fig. 7, Table ??). The recorded time interval within individual grains is generally longer in the South and East regions of the study area (Fig. 2). The total age range covers the time from ca. 19 to 5 Ma. The monazite-(Ce) chronologic record can be seen to start in the eastern- and southernmost regions (Fig. 9). The recorded activity then moves *through* to the northeastern and central *areas (gcd)* to the western area. *get* Younger ages in the west progressively concentrate on the large fault systems of the Rhone-Simplon Fault and the proposed location of the Rhine-Rhone Line *to the north of the Lepontine Dome*. The oldest recorded monazite-(Ce) ages of 19-17 Ma from the eastern edge of the study area (Figs. 7s, 9a) coincide with a phase of rapid exhumation and cooling between 22 and 17 Ma (Steck and Hunziker, 1994; Rubatto et al., 2009). At that time, temperatures in parts of the north-western area (northern Ticino Dome) were still prograde at 450-430 *no space* °C 19-18 Ma (Janots et al., 2009) as deduced from allanite dating. After this, temperatures must have decreased to lower temperatures during exhumation, as hydrothermal monazite-(Ce) crystallization in the north(east)ern area started at around 16 Ma in the Valsertal (sample VALS, Fig. 7t) and then at the southern edge of the Gotthard nappe at 14-15 Ma (Fig. 9b). This may indicate crystallization during a deformation phase indicated by 17-14 Ma  $^{40}\text{Ar}/^{39}\text{Ar}$  biotite ages interpreted as dating recrystallization (Wiederkehr et al., 2009).
- The monazite-(Ce) age record for the entire (north)eastern region continues until *Italy* ca. 13 Ma after which the record ends for the Valsertal where cooling below 180°C is dated at around 12 Ma (zircon U/Th-He; Price et al., 2018). The age range of the Valsertal sample of 16-12 Ma perfectly coincides with hydrothermal cleft monazite-(Ce) ages from within the Gotthard nappe of *Italy* ca. 16-12 Ma (Janots et al., 2012; Ricchi et al., in review), after which monazite activity moved *South* into the Lepontine dome south of the Gotthard nappe. Locally within in the dome, in the northern part of the western region, zircon fission track (ZFT) ages of 10-9 Ma in the border area of Ticino dome and Gotthard nappe (Janots et al., 2009) are equal to the last widely recorded hydrothermal monazite-(Ce) ages of around 10 Ma. One sample records ages of 9-8 Ma (BLAS1; Fig. 4m) *which* that is in agreement with K/Ar fault gouge data of  $8.9 \pm 0.2$  to  $7.9 \pm 0.2$  Ma close to BLAS1 and SALZ2 (Alp Transit tunnel; Zwingmann et al., 2010), as fault gouge ages seem to typically coincide with the end of monazite-(Ce) growth (see below; Bergemann et al., 2017).

- While  $^{40}\text{Ar}/^{39}\text{Ar}$  cleft muscovite ages of  $15.60 \pm 0.30$  to  $14.71 \pm 0.13$  Ma (Rauchenstein-Martinek, 2014) slightly south of LUCO1 coincide with the earliest monazite-(Ce) crystallization, this differs markedly from the situation further west or in the Aar and Mont Blanc massifs (Bergemann et al., 2017; 2019). There, as discussed below, ZFT ages predate or mirror primary monazite-(Ce) crystallization and are in turn predated by  $^{40}\text{Ar}/^{39}\text{Ar}$  white mica ages. The coincidence of ~~these~~ ZFT and  $^{40}\text{Ar}/^{39}\text{Ar}$  muscovite cooling ages with the hydrothermal monazite-(Ce) crystallization suggests slow cooling rates during

*Ages in this study*



(31)

same font size  
as other faults!

$13.6 \pm 0.4$

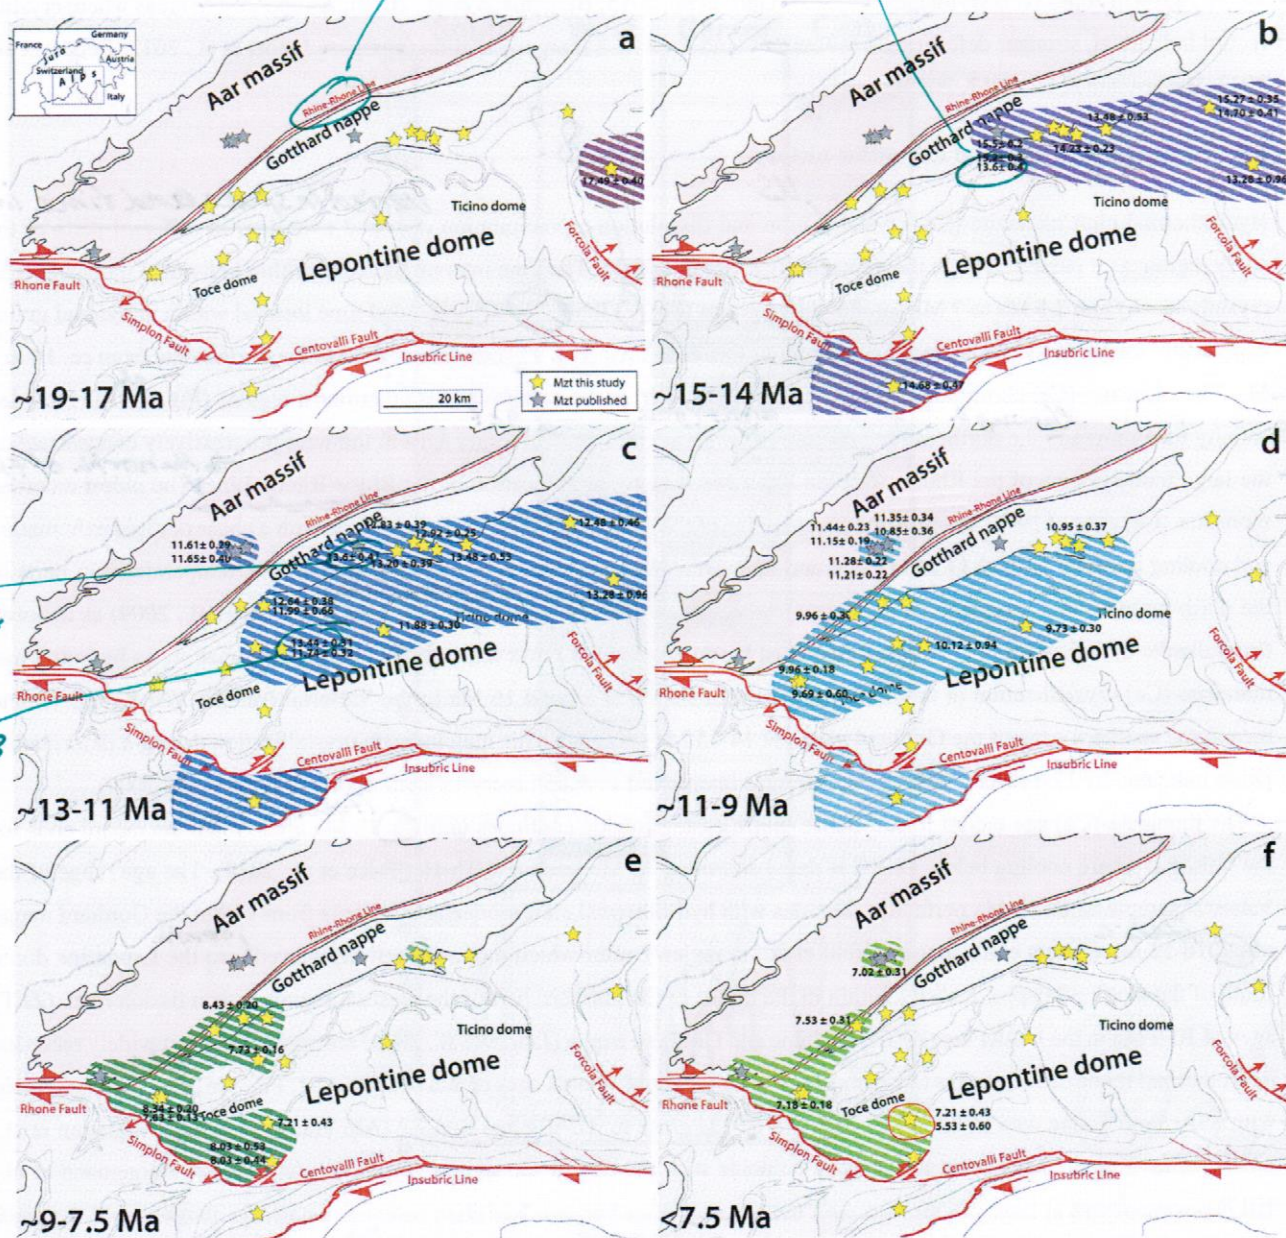

**Figure 9.** Overview maps of the study area showing the distribution of the monazite-(Ce) age record over time. Weighted mean average ages are given near the stars representing the corresponding sample locations. Note the shift over time from the outer regions of the Lepontine dome to the internal areas and then to the shear zones bounding its western limit.



= continued deformation (Bergemann et al., 2018) for the time from around 15 Ma until ca. 9 Ma, as the systems closed only at the lower end of the closure temperature window in this case. *italic* ~~ZFT and~~ *argon*

— To the west, an early phase of accelerated cooling in the area was dated at 18-15 Ma (Steck and Hunziker, 1994; Campani et al., 2010), evidence of which is also preserved in the oldest monazite-(Ce) data of 17 Ma (Fig. 7a) from south of the Rhone-Simplon Fault (RSF). Zircon fission track ages of 14-11 Ma (Hurford, 1986) and cleft adularia ages between  $12.92 \pm 0.17$  Ma and  $10.82 \pm 0.12$  Ma (Rauchenstein-Martinek, 2014) from south of the western Gotthard slightly predate or coincide with a later phase cooling and increased tectonic activity in the western Lepontine area. Primary monazite-(Ce) crystallization in parts of the northwestern and central Lepontine as well as the central Aar massif occurs at around 12 Ma, followed by monazite-(Ce) crystallization in the westernmost area around 11-10 Ma dating exhumation (Fig. 9 c,d). Multiple monazite-(Ce) samples from locations in the Gotthard nappe and Aar-massif yield weighted average ages of 10 Ma. These age patterns are related to processes during backfolding of the northern steep belt (in the sense of Milnes 1974), dating it to ca. 10 Ma in this area (Steck, 1984; Steck and Hunziker, 1994; Campani et al., 2014). *at* *space* *?? ga?*

The 12-10 Ma cooling phase of the western Lepontine was related to detachment movements along the Rhone-Simplon Fault. This time interval marks the end of the hydrothermal monazite-(Ce) age record in the hanging wall of the Rhone-Simplon Fault. Correspondingly, 12-10 Ma also marks the beginning of monazite-(Ce) crystallization to the east of the fault, first in the vicinity of the Aar massif (Figs. 7 c, d, i) and then also further south (Fig. 7k). Primary monazite-(Ce) crystallization ages along the eastern side of the RSF are tendentially predating, but still in close agreement with zircon fission track ages in this area. In the case of sample VANI6 from south of the RSF (Fig. 5a) ZFT ages of this area show a scatter from 12 to 7 Ma (Keller et al., 2005) that overlap with the youngest monazite-(Ce) age spots. Monazite-(Ce) ages of 9-7.5 Ma indicate continued exhumation of the western region and the central areas leave the hydrothermal monazite-(Ce) stability field at this time (Fig. 9f). The number of weighted mean ages (i.e. clear age patterns within the crystals) staggered over a relatively short time (Fig. 8), suggest deformation pulses during brittle tectonics along the Rhone-Simplon/Centovalli Faults and corroborates evidence of continued deformation along the southern RSF and the Centovalli Fault (Zwingmann and Mancktelow, 2004; Surace et al., 2011). The youngest widely recorded monazite-(Ce) age group for the western Lepontine dates to around 7 Ma (Figs. 7 b, d, j-l; 9f). This coincides with young fault gouge data of 8-6 in this region (Zwingmann and Mancktelow, 2004; Surace et al., 2011). Overall, the 10-7 Ma time interval is characterized by phases of strike-slip deformation along the extended Rhone-Simplon fault system. This is recorded through hydrothermal monazite-(Ce) and fault gouge illite crystallization that was not restricted to the south-western Lepontine but also recorded in faults bounding the Mont Blanc massif (Bergemann et al., 2019). The ages of 8-7 Ma of the sample with the youngest recorded age (VANI5) among the studied monazites-(Ce) are concurrent with the youngest recorded ages of all other samples along the Rhone-Simplon fault system. The sample comes from an area where hydrothermal gold mineralization occurred and the youngest age group of VANI5 give a weighted mean age of  $5.53 \pm 0.60$  Ma that coincides with ZFT ages of 6.4-5.5 Ma (Keller et al., 2005). The area also has a muscovite  $^{40}\text{Ar}/^{39}\text{Ar}$  age of  $10.56 \pm 0.31$  Ma (Pettke et al., 1999) that postdates other white mica ages of the area by 4-5 Ma (see summary in Campani et al., 2010), similar to the difference between the youngest recorded ages for monazite-(Ce) samples from the same area. *not in reference list* *italic* *W zone?*

32 15 20 25 30 33 34 35



## 6 Conclusions

Hydrothermal fissure monazite-(Ce) always dates crystallization and not cooling <sup>below</sup> ~~due to~~ system closure and often shows complex recrystallization features. It provides an important record of the shifting tectonic activity associated with the regions exhumation history within the monazite stability field. A comparison between hydrothermal monazite-(Ce) samples from different parts of the Lepontine metamorphic dome shows that age clusters within individual crystals from a simply exhuming area have a less clear age distribution than samples from fault zone areas, or fast exhuming areas. Monazite-(Ce) (re)crystallization/dissolution-precipitation during exhumation <sup>in</sup> these areas connected to repeated tectonic activity of <sup>low</sup> small intensity, while distinct events or short periods of intense tectonic activity of fault zones appear to result in larger, more homogenous crystal zones that are easier to date.

The  $^{232}\text{Th}$ - $^{208}\text{Pb}$  monazite-(Ce) crystallization data records prolonged hydrothermal activity between 19 and 5 Ma contribute to the understanding of the tectonic evolution of the Central Alps in a temperature range of ca. 350-200°C. The oldest ages of 19-17 Ma come from the eastern- and southernmost regions of the study area (Fig. 2) in the hanging wall of the Forcola and Rhone-Simplon faults defining the borders of the metamorphic dome. Within the dome, monazite-(Ce) crystallization started in the northern Ticino dome and eastern Gotthard nappe around 15 Ma and show signs of slow exhumation. Further west, in the Toce dome, primary <sup>HS</sup> crystallization occurred in the western Gotthard nappe and the central Aar massif at 12-10 Ma. Younger ages of 9-7 Ma in the west of the study area record the progressive concentration of tectonic activity along the large fault systems of the Rhone-Simplon Fault and the Rhine-Rhone Line.

*Competing interests.* No competing interests are present.

*Acknowledgements.* This work was funded by the Swiss National foundation, projects 200021-143972 and 200020-165513. We greatly appreciate the help of M. Andres, R. Duthaler, M. Flepp, S. Graeser, L. Klemm, B. Hofmann, A. Salzmann, F. Vanini, and M. Walter in organizing monazite-(Ce) samples for this study.
